# Supplementary material for: The Protective Effect of Esculentoside A on Experimental Acute Liver Injury in Mice
Source: PLoS One. 2014 Nov 18;9(11):e113107. doi: 10.1371/journal.pone.0113107 (PMC4236201; doi:10.1371/journal.pone.0113107)
Supplement: Figure S5 — The primary data for EsA treatment on CCl4-induced liver inflammation in mice. (XLS) [file pone.0113107.s005.xls]

## Sheet: Sheet1
f480	对照	ESA	损伤	治疗
	3	2	15	10
	0	0	14	8
	0	2	18	9
	1	0	12	7
	2	2	15	12
	1	1	20	8
cd11b	对照	ESA	损伤	治疗
	0	0	22	11
	1	2	13	13
	2	1	20	8
	1	1	19	12
	0	0	18	11
	1	3	17	14
PCR
		正常									ESA						损伤
	GAPDH	15.3567	16.8754	15.8759	17.6769	16.8548	16.3861		GAPDH	16.4542	16.2424	16.4366	16.9873	16.7768	16.3861		15.5876	16.2427	15.9114	16.4242	15.9674	16.1424
	IL-6	28.3568	29.1445	28.0916	29.2457	28.6856	29.1296		IL-6	28.2033	28.9084	27.3236	29.4817	28.7608	28.4682		23.8644	25.1574	24.746	24.8369	25.0056	24.5406
	TNF-a	31.3424	31.2146	31.8563	32.3368	31.2343	31.2435		TNF-a	31.2999	31.3124	31.8563	32.2433	30.6544	31.7346		27.354	28.9424	29.3511	28.2142	28.805	28.8654
	IL-1β	26.1356	26.2424	26.3214	31.4041	30.1314	30.2313		IL-1β	26.1442	26.2765	26.8668	30.2342	30.9634	30.7243		24.1165	25.3421	25.4255	25.3123	25.4412	25.2353
	IL-6	13.0001	12.2691	12.2157	11.5688	11.8308	12.7436		IL-6	11.7491	12.6661	10.887	12.4943	11.984	12.0821		8.27686	8.91476	8.8346	8.41273	9.03819	8.39819
	TNF-a	15.9857	14.3391	15.9804	14.6599	14.3795	14.8575		TNF-a	14.8457	15.0701	15.4197	15.2559	13.8776	15.3486		11.7664	12.6997	13.4397	11.7901	12.8376	12.723
	IL-1β	10.7789	9.36699	10.4455	13.7272	13.2766	13.8453		IL-1β	9.68994	10.0341	10.4302	13.2469	14.1866	14.3383		8.52894	9.09946	9.51412	8.88816	9.47372	9.09291
	15.9804
	IL-6	-2.98027	-3.71128	-3.76472	-4.41162	-4.14954	-3.2368		IL-6	-4.23132	-3.31432	-5.09336	-3.48606	-3.99637	-3.89825		-7.70352	-7.06563	-7.14579	-7.56766	-6.9422	-7.5822
	TNF-a	0.00529317	-1.64126	0	-1.3205	-1.60091	-1.12291		TNF-a	-1.13472	-0.910295	-0.560637	-0.724449	-2.10282	-0.631812		-4.21399	-3.28065	-2.54072	-4.19033	-3.14282	-3.2574
	IL-1β	-5.2015	-6.61339	-5.53489	-2.25319	-2.70374	-2.1351		IL-1β	-6.29044	-5.94629	-5.55019	-2.73352	-1.79381	-1.6421		-7.45144	-6.88093	-6.46627	-7.09223	-6.50666	-6.88748
	IL-6	2.98027	3.71128	3.76472	4.41162	4.14954	3.2368		IL-6	4.23132	3.31432	5.09336	3.48606	3.99637	3.89825		7.70352	7.06563	7.14579	7.56766	6.9422	7.5822
	TNF-a	-0.00529317	1.64126	0	1.3205	1.60091	1.12291		TNF-a	1.13472	0.910295	0.560637	0.724449	2.10282	0.631812		4.21399	3.28065	2.54072	4.19033	3.14282	3.2574
	IL-1β	5.2015	6.61339	5.53489	2.25319	2.70374	2.1351		IL-1β	6.29044	5.94629	5.55019	2.73352	1.79381	1.6421		7.45144	6.88093	6.46627	7.09223	6.50666	6.88748
	IL-6	7.89136	13.098	13.5923	21.2828	17.7475	9.42703		IL-6	18.7825	9.94743	34.1393	11.2049	15.9598	14.9104		208.445	133.957	141.611	189.711	122.973	191.633
	TNF-a	0.996338	3.11938	1	2.49753	3.03335	2.17786		TNF-a	2.19577	1.87943	1.47492	1.65227	4.29547	1.54951		18.5583	9.71793	5.81879	18.2564	8.83247	9.56258
	IL-1β	36.7965	97.9105	46.3627	4.76737	6.51489	4.39267		IL-1β	78.2731	61.661	46.8569	6.65076	3.46729	3.1212		175.028	117.86	88.418	136.45	90.9287	118.396
	IL-6	13.8398	17.4907	164.722	63.4977
	TNF-a	2.13741	2.17456	11.7911	5.36613
	IL-1β	32.7908	33.3384	121.18	61.1156
	IL-6	18.7825	9.94743	34.1393	11.2049	15.9598	14.9104
	TNF-a	2.19577	1.87943	1.47492	1.65227	4.29547	1.54951
	IL-1β	78.2731	61.661	46.8569	6.65076	3.46729	3.1212
			IL-6					TNF-a							IL-1β
			正常	ESA	损伤	治疗		正常	ESA	损伤	治疗				正常	ESA	损伤	治疗
			7.89136	18.7825	208.445	30.8512		0.996338	2.19577	18.5583	8.22462				36.7965	78.2731	175.028	39.4112
			13.098	9.94743	133.957	42.8033		3.11938	1.87943	9.71793	4.34954				97.9105	61.661	117.86	65.3382
			13.5923	34.1393	141.611	54.7512		1	1.47492	5.81879	3.54834				46.3627	46.8569	88.418	33.2083
			21.2828	11.2049	189.711	101.347		2.49753	1.65227	18.2564	3.97475				4.76737	6.65076	136.45	101.764
			17.7475	15.9598	122.973	72.1163		3.03335	4.29547	8.83247	1.89946				6.51489	3.46729	90.9287	22.4237
			9.42703	14.9104	191.633	79.117		2.17786	1.54951	9.56258	10.2001				4.39267	3.1212	118.396	104.549
			IL-6					TNF-a
			正常	ESA	损伤	治疗		正常	ESA	损伤	治疗				IL-1β
			0.526091	1.25217	13.8963	2.05675		0.664225	1.46384	12.3722	5.48308				正常		损伤	治疗
			0.873202	0.663162	8.93047	2.85355		2.07959	1.25295	6.47862	2.8997				1.83983	3.91365	8.75141	1.97056
			0.906157	2.27595	9.44074	3.65008		0.666667	0.98328	3.87919	2.36556				4.89553	3.08305	5.89299	3.26691
			1.41886	0.746994	12.6474	6.75646		1.66502	1.10151	12.1709	2.64984				2.31813	2.34285	4.4209	1.66041
			1.18317	1.06398	8.1982	4.80776		2.02223	2.86365	5.88832	1.26631				0.238369	0.332538	6.8225	5.08818
			0.628469	0.994027	12.7755	5.27446		1.45191	1.03301	6.37506	6.80005				0.325744	0.173365	4.54644	1.12118
															0.219633	0.15606	5.91979	5.22744
